# Supplementary material
Source: publisher site journal article supplement (https://www.dovepress.com/article/402179)
Supplement: Supplementary file 1 [file get_supplementary_file.php]

# Supplementary methods

**Transmission electron microscopy**

The diluted solution of hucMSC-exo in PBS was pipetted onto the copper net and made to stand for 1 min, after which it was counterstained with 2% uranyl acetate for 1-2 min. After drying at room temperature, images were captured under 100kv transmission electron microscope (HITACHIH-7000FA, Tokyo, Japan).

# Supplementary Tables and Figures

**Supplementary table 1** Scoring system for calculating a disease activity index (DAI)

| **Body weight loss (%)** | **Stool** | **Bleeding** | **Score** |
| --- | --- | --- | --- |
| ＜2% | Normal | No rectal bleeding | 0 |
| ≥2-＜5% | Softer stool | Weak haemoccult | 1 |
| ≥5-＜10% | Moderate diarrhoea | Visual blood in stool | 2 |
| ≥10-＜15% | Diarrhoea | Fresh rectal bleeding | 3 |
| ≥15% | - | - | 4 |

**Note:** Reproduced from Wang L, Xie H, Xu L, et al. rSj16 Protects against DSS-Induced Colitis by Inhibiting the PPAR-α Signaling Pathway. *Theranostics*. 2017;7(14):3446-3460.1

**Supplementary table 2** Scoring system for calculating histology score

| **Feature** | **Score** | **Description** |
| --- | --- | --- |
| Inflammation (I) | 0 | None |
|  | 1 | Slight |
|  | 2 | Moderate |
|  | 3 | Severe |
| Extent (E) | 0 | None |
|  | 1 | Mucosa |
|  | 2 | Mucosa and submucosa |
|  | 3 | Transmural |
| Regeneration (R) | 0 | Complete regeneration or normal tissue |
|  | 1 | Almost complete regeneration |
|  | 2 | Regeneration with crypt depletion |
|  | 3 | Surface epithelium not intact |
|  | 4 | No tissue repair |
| Crypt damage (C) | 0 | None |
|  | 1 | Basal 1/3 damaged |
|  | 2 | Basal 2/3 damaged |
|  | 3 | Only surface epithelium intact |
|  | 4 | Entire crypt and epithelium lost |
| Percent involvement (P) | 1 | 1%～25% |
|  | 2 | 26%～50% |
|  | 3 | 51%～75% |
|  | 4 | 76%～100% |

**Notes**: Reproduced from Dieleman LA, Palmen MJ, Akol H, et al. Chronic experimental colitis induced by dextran sulphate sodium (DSS) is characterized by Th1 and Th2 cytokines. *Clinical and experimental immunology*. 1998;114(3):385-391, by permission of Oxford University Press.2

Histopathological score = score (I) + score (E) + score (R) + score (C) + score (P)

**Supplementary table 3** Primers sequences for RT-PCR.

| **Target gene** | **Corresponding primer sequences** |
| --- | --- |
| Mouse *Il-10* | Forward: 5'GCTCTTACTGACTGGCATGAG3'  Reverse: 5'CGCAGCTCTAGGAGCATGTG3' |
| Mouse *Il-17* | Forward: 5'TTTAACTCCCTTGGCGCAAAA3'  Reverse: 5'CTTTCCCTCCGCATTGACAC3' |
| Mouse *Inf-γ* | Forward: 5'ATGAACGCTACACACTGCATC3'  Reverse: 5'CCATCCTTTTGCCAGTTCCTC3' |
| Mouse *Tnf-α* | Forward: 5' CCCTCACACTCAGATCATCTTCT3'  Reverse: 5' GCTACGACGTGGGCTACAG3' |
| Mouse *Gapdh* | Forward:5'AGGTCGGTGTGAACGGATTTG3'  Reverse:5'TGTAGACCATGTAGTTGAGGTCA3' |

**
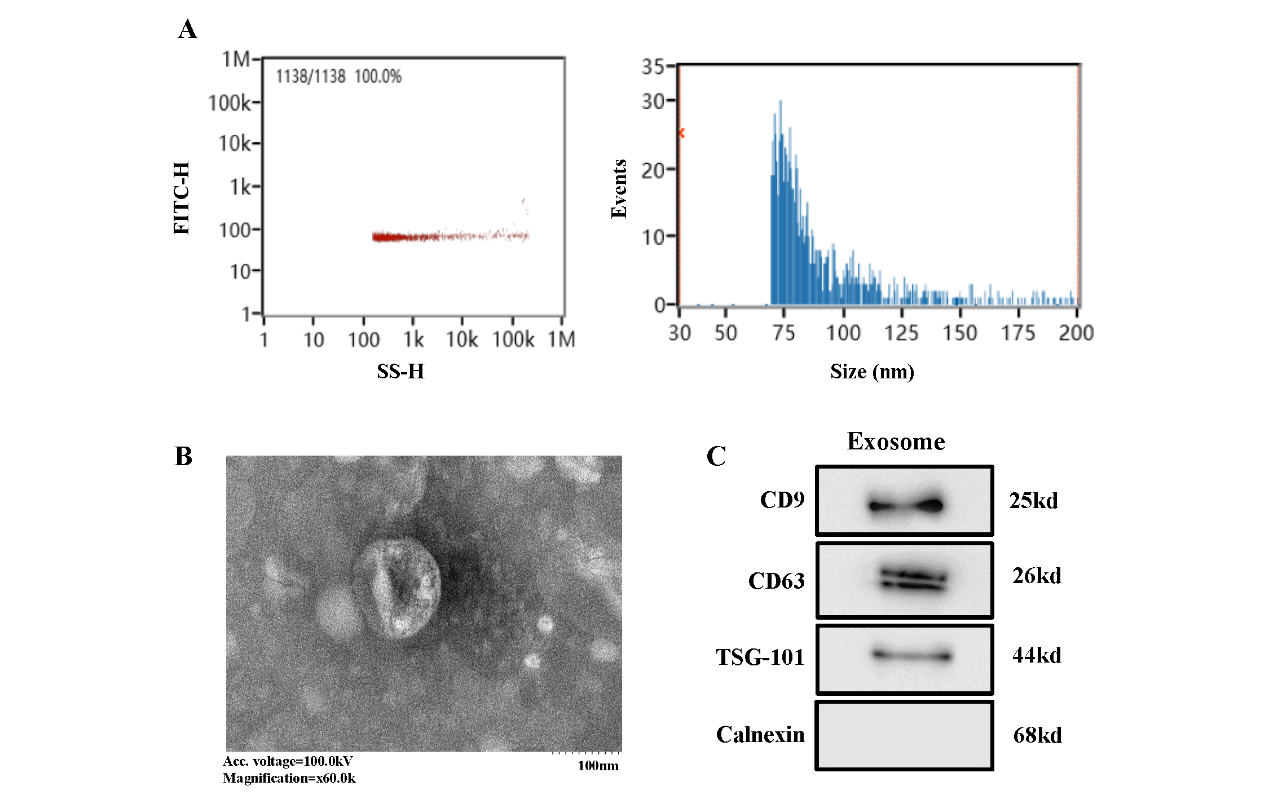
Supplementary Figure 1 Identification of hucMSC-exo.** A: The particles size distribution profile of exosomes indicated by NanoFCM. Particles size were analyzed according to this formula: y=5.38022E-9*x(5.7052)+0, y=SS-H, x=Size. B: The morphology of exosomes observed under TEM. C: The protein expressions of CD9, CD63, TSG 101, and calnexin analyzed by western blot.

**
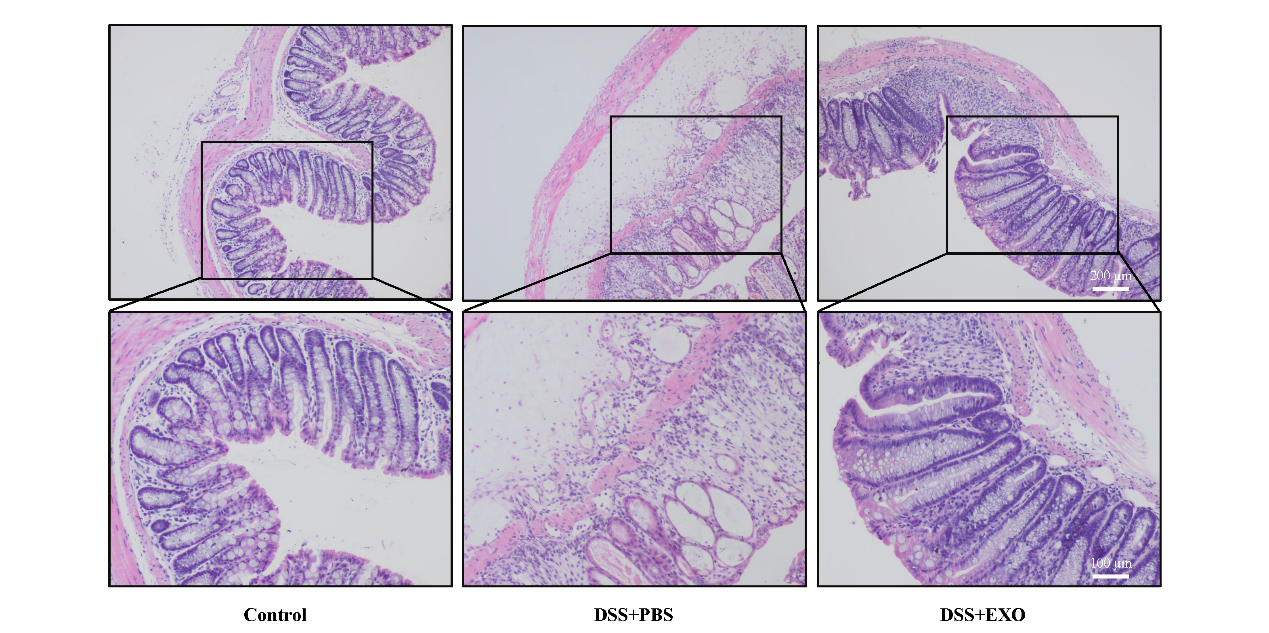
Supplementary Figure 2 H&E staining of mice colon sections in DSS-induced colitis model.**

**
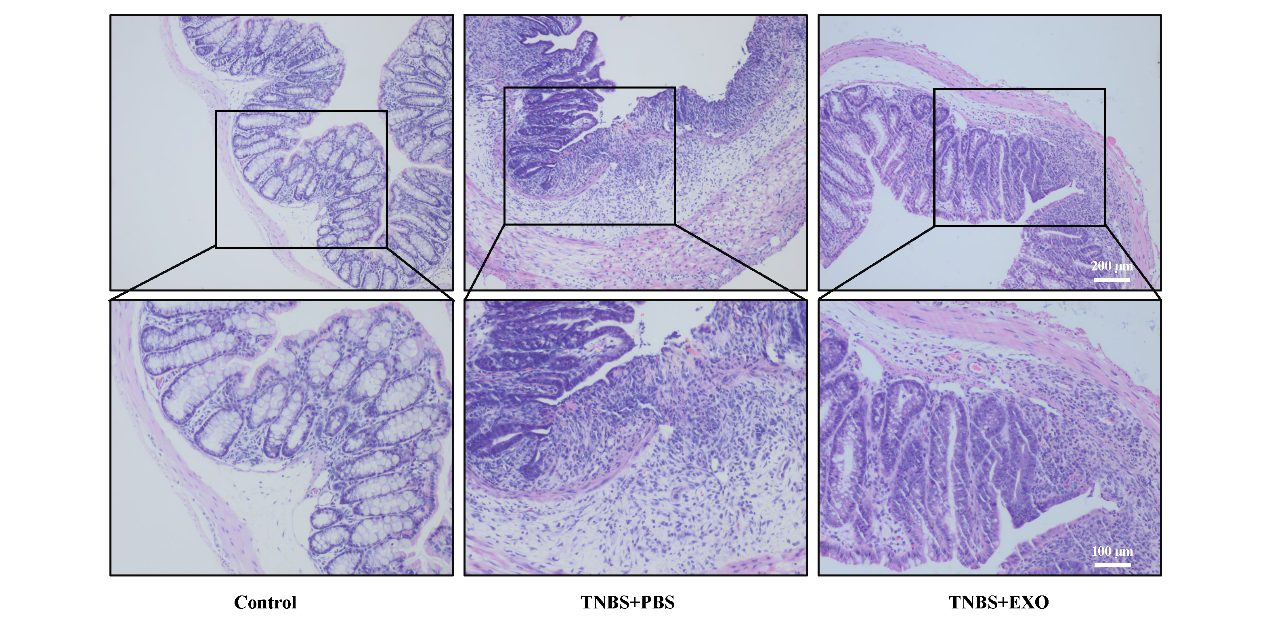
Supplementary Figure 3 H&E staining of mice colon sections in TNBS-induced colitis model.**

**
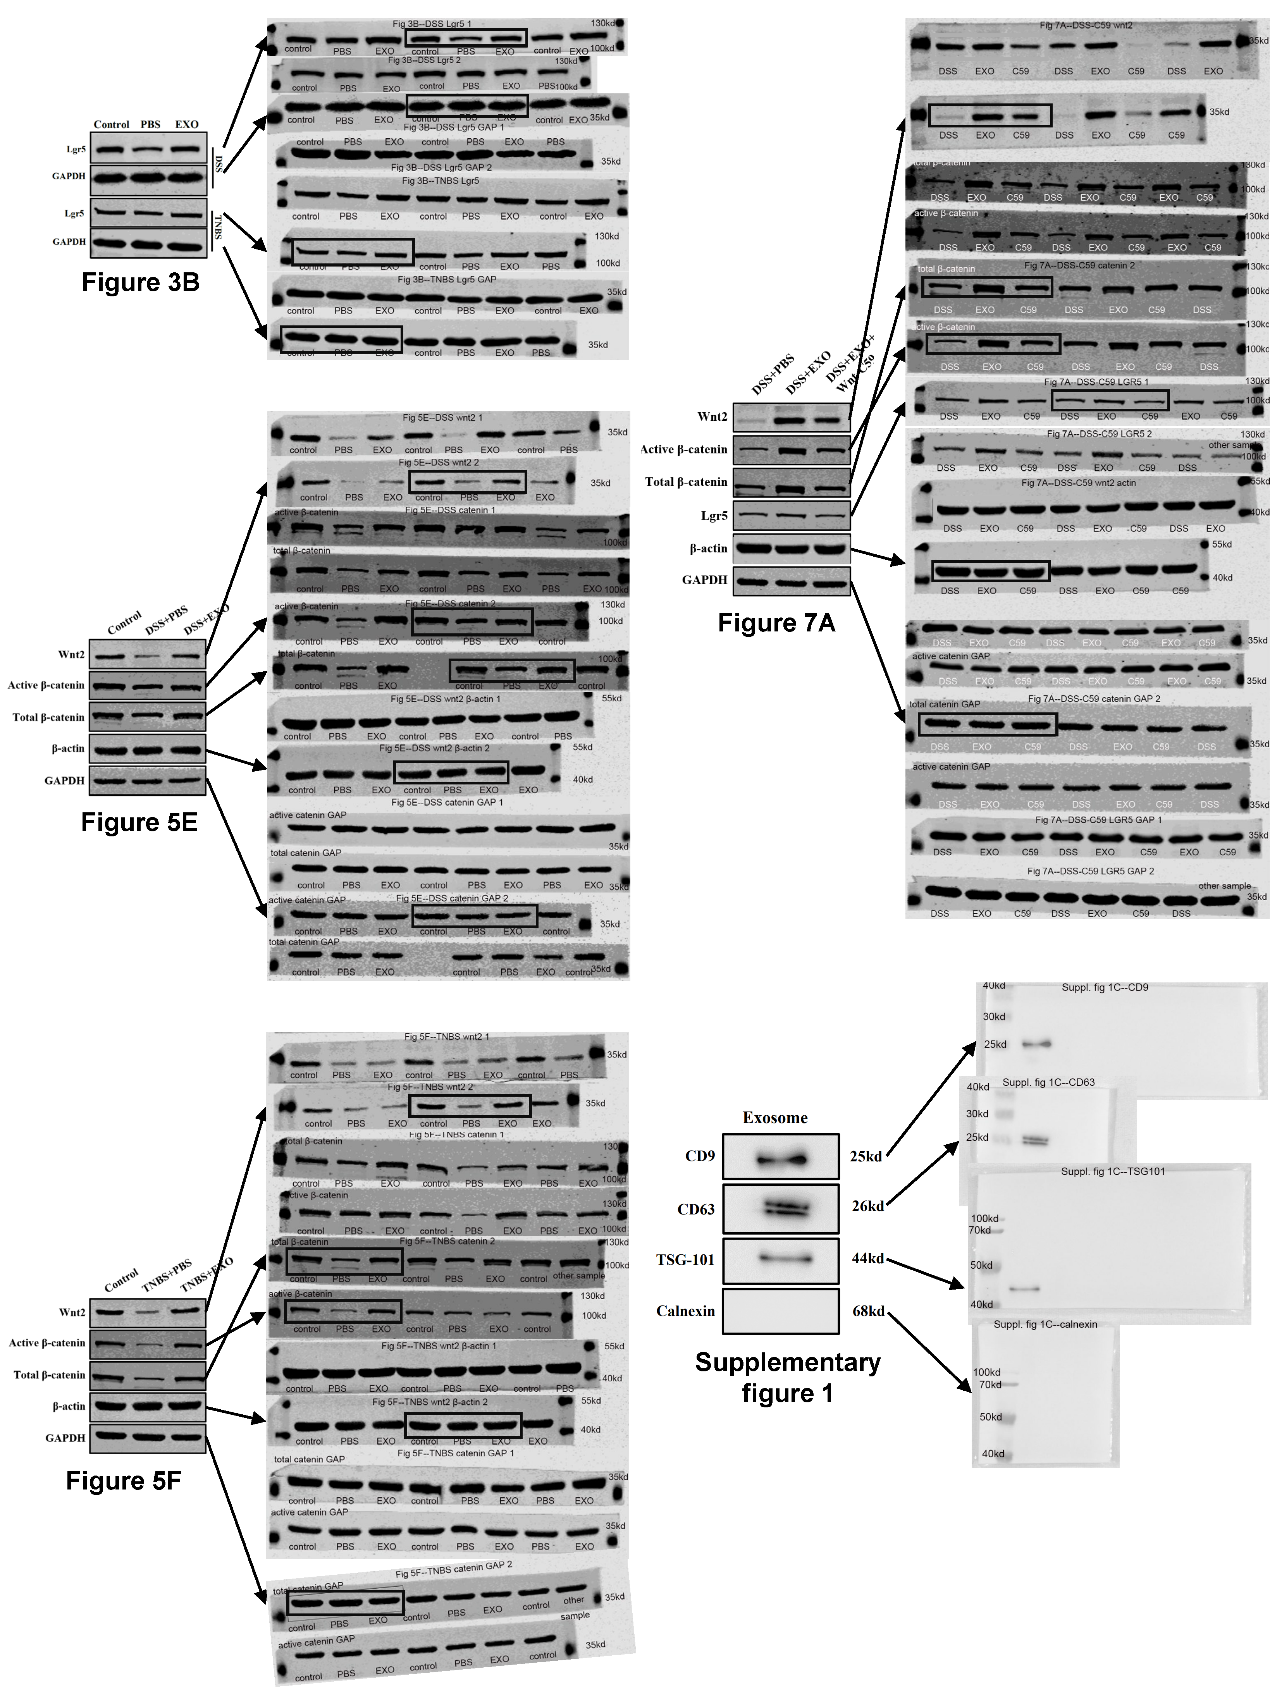
Supplementary Figure 4 The original unprocessed western blot images.** Black rectangles marked bolts we presented in manuscript.

**
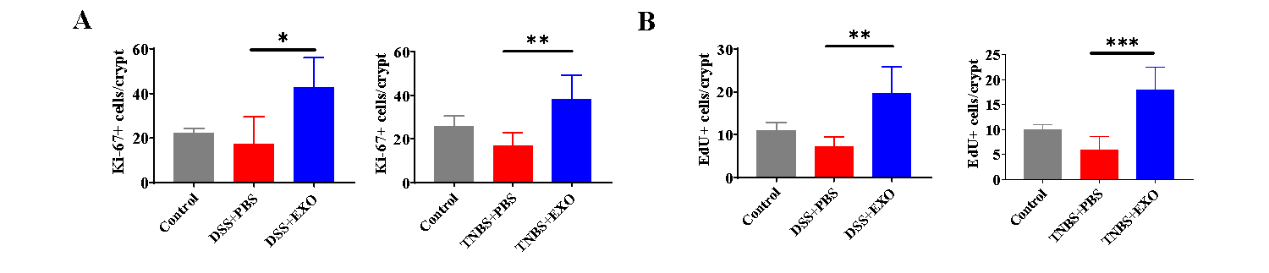
Supplementary Figure 5 The proliferation potential of the remaining colon epithelium was measured by IHC staining of Ki-67 and EdU incorporation assay.** A: The mean numbers of Ki-67+ cells in five glands per high power field (HPF) were calculated. B: The mean numbers of EdU+ cells in five glands per HPF were calculated. If glands were destroyed completely, the number of Ki-67+ or EdU+ cells per crypt was recorded as zero. Data are presented as mean ± SD. The Unpaired Student’s *t* test was used to compare the variables between two groups. *P*＜0.05 was considered as statistically significant. **P*<0.05, ***P*<0.01 and ****P*<0.001.

**
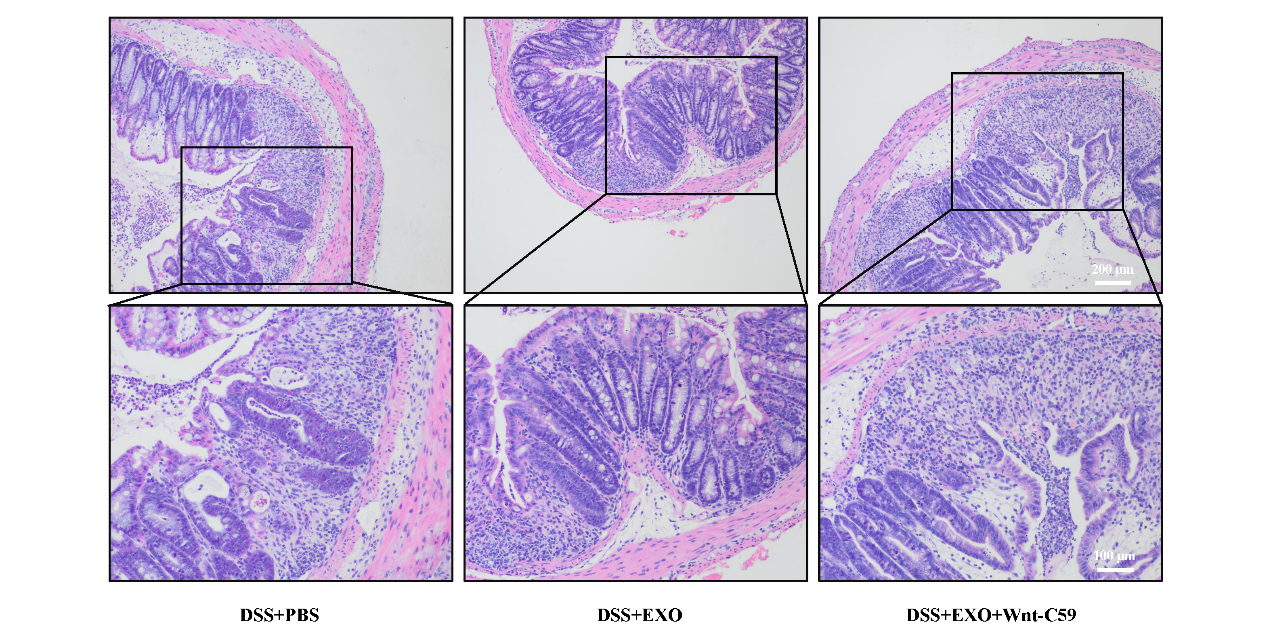
Supplementary Figure 6 H&E staining of mice colon sections in Wnt signaling pathway inhibited model.**

**
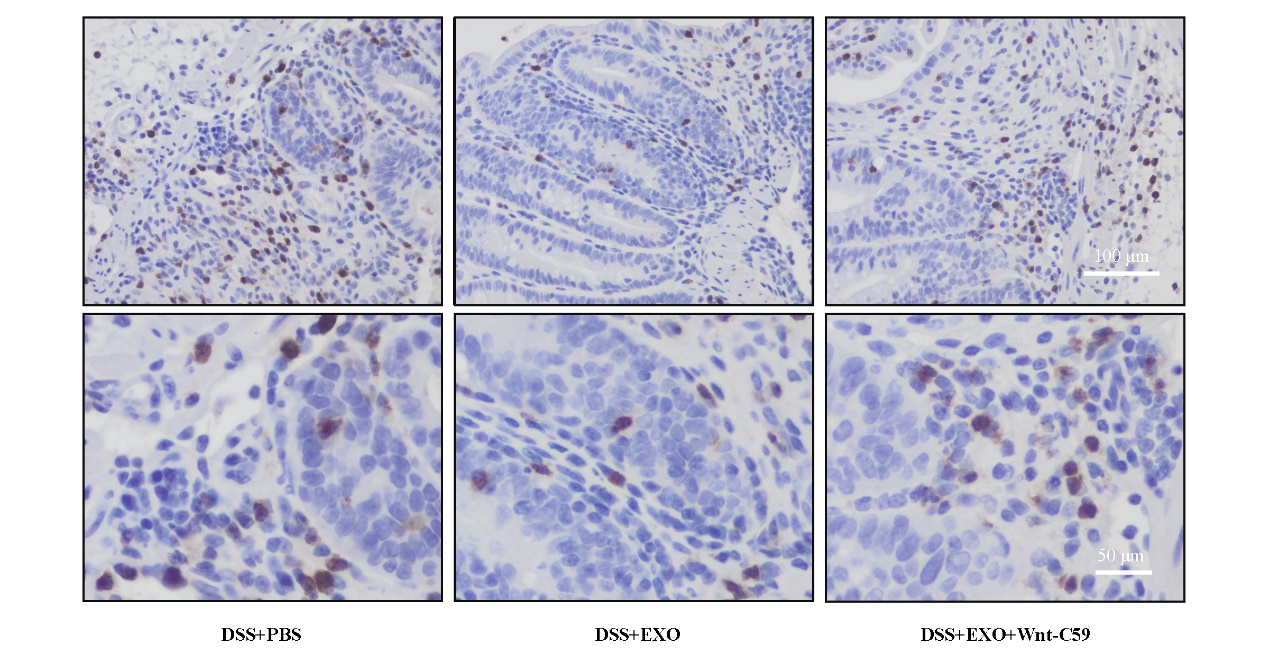
Supplementary Figure 7 MPO staining of mice colon sections in Wnt signaling pathway inhibited model.**

**
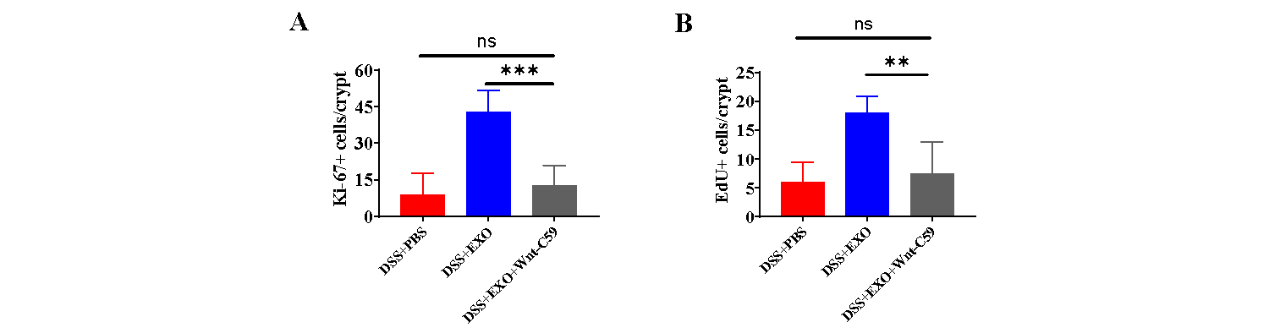
Supplementary Figure 8 The proliferation potential of the remaining colon epithelium was measured by IHC staining of Ki-67 and EdU incorporation assay.** A: The mean numbers of Ki-67+ cells in five glands per HPF were calculated. B: The mean numbers of EdU+ cells in five glands per HPF were calculated. If all glands were destroyed, the number of Ki-67+ or EdU+ cells per crypt was recorded as zero. Data are presented as mean ± SD. The Unpaired Student’s *t* test was used to compare the variables between two groups. *P*＜0.05 was considered as statistically significant. ***P*<0.01 and ****P*<0.001, ns indicates *P*>0.05.

**Supplementary table 4** Top 20 miRNAs expressed in hucMSCs and different hucMSC-exo data sets from GEO database and additional file from Yi Zhang’s article.

| Data | GSE46989 | | GSE69909 | |
| --- | --- | --- | --- | --- |
| Rank | miRNA ID | RPM | miRNA ID | Counts |
| 1 | hsa-mir-21-5p | 457856 | hsa-miR-21-5p | 19569 |
| 2 | hsa-mir-143-3p | 179536 | hsa-miR-125b-5p | 16003 |
| 3 | hsa-mir-24-3p | 11564 | hsa-miR-23a-3p | 7716 |
| 4 | hsa-let-7a-5p | 7826 | hsa-miR-100-5p | 5284 |
| 5 | hsa-mir-125b-5p | 7040 | hsa-let-7f-5p | 5087 |
| 6 | hsa-mir-100-5p | 5094 | hsa-let-7a-5p | 3920 |
| 7 | hsa-let-7f-5p | 5031 | hsa-miR-145-5p | 3129 |
| 8 | hsa-mir-424-5p | 4707 | hsa-miR-1260b | 3105 |
| 9 | hsa-mir-29a-3p | 4631 | hsa-miR-1260a | 2925 |
| 10 | hsa-mir-29c-3p | 4070 | hsa-miR-199a-3p | 2464 |
| 11 | hsa-mir-30a-5p | 4058 | hsa-miR-16-5p | 2287 |
| 12 | hsa-mir-381 | 3253 | hsa-miR-195-5p | 2098 |
| 13 | hsa-mir-30d-5p | 3173 | hsa-miR-191-5p | 2007 |
| 14 | hsa-mir-30e-5p | 3125 | hsa-miR-221-3p | 1896 |
| 15 | hsa-mir-31-5p | 2847 | hsa-miR-222-3p | 1797 |
| 16 | hsa-mir-99a-5p | 2696 | hsa-miR-23b-3p | 1730 |
| 17 | hsa-mir-29b-3p | 2584 | hsa-miR-3120-5p | 1699 |
| 18 | hsa-mir-103a-3p | 2367 | hsa-miR-214-3p | 1673 |
| 19 | hsa-mir-127-3p | 2293 | hsa-miR-7110-3p | 1673 |
| 20 | hsa-mir-101-3p | 2140 | hsa-miR-31-5p | 1662 |

| Data | GSE159814 | | additional file from Yi Zhang’s article | | |
| --- | --- | --- | --- | --- | --- |
| Rank | miRNA ID | Counts | miRNA ID | Total  count | Normalized  Value |
| 1 | hsa-miR-21-5p | 74384 | hsa-miR-148a-3p | 2261689 | 107489 |
| 2 | hsa-miR-24-3p | 43732 | hsa-miR-423-5p | 717582 | 34104 |
| 3 | hsa-miR-22-3p | 26432 | hsa-miR-151a-3p | 402521 | 19130 |
| 4 | hsa-miR-26a-5p | 21348 | hsa-miR-320a | 263196 | 12509 |
| 5 | hsa-miR-146a-5p | 17968 | hsa-let-7i-5p | 223998 | 10646 |
| 6 | hsa-miR-221-3p | 14482 | hsa-miR-21-5p | 171125 | 8133 |
| 7 | hsa-let-7a-5p | 12878 | hsa-let-7f-5p | 138359 | 6576 |
| 8 | hsa-miR-29a-3p | 12691 | hsa-let-7a-5p | 90980 | 4324 |
| 9 | hsa-miR-100-5p | 9301 | hsa-miR-143-3p | 79912 | 3798 |
| 10 | hsa-miR-125b-5p | 8988 | hsa-miR-146a-5p | 78002 | 3707 |
| 11 | hsa-miR-222-3p | 8130 | hsa-miR-122-5p | 75388 | 3583 |
| 12 | hsa-miR-148a-3p | 8128 | hsa-miR-26a-5p | 69337 | 3295 |
| 13 | hsa-miR-143-3p | 7910 | hsa-miR-100-5p | 59123 | 2810 |
| 14 | hsa-let-7f-5p | 7823 | hsa-miR-126-3p | 42927 | 2040 |
| 15 | novel_115 | 7758 | hsa-let-7b-5p | 42070 | 1999 |
| 16 | hsa-miR-199a-3p | 7520 | hsa-miR-223-3p | 36514 | 1735 |
| 17 | hsa-let-7i-5p | 6530 | hsa-miR-584-5p | 34611 | 1645 |
| 18 | novel_200 | 5564 | hsa-miR-25-3p | 31792 | 1511 |
| 19 | hsa-miR-122-5p | 5559 | hsa-miR-24-3p | 28602 | 1359 |
| 20 | hsa-miR-23a-3p | 5241 | hsa-miR-4433b-3p | 27774 | 1320 |

**Supplementary table 5** Target genes for *hsa-mir-21-5p*, *hsa-let-7a-5p*, *hsa-mir-100-5p* and *hsa-let-7f-5p* predicted using TargetScan, miRDB and TarBase.

| Target genes for *hsa-mir-21-5p* | | | | | | | | |
| --- | --- | --- | --- | --- | --- | --- | --- | --- |
| GPR64 | KRIT1 | PRDM11 | MRPL49 | SOCS5 | EDNRB | CASKIN1 | CNBP | SLC25A43 |
| AIM1L | IL12A | RAB6D | SNX29 | SPON1 | SLMAP | MBLAC2 | 10-Sep | PALB2 |
| RNFT1 | FASLG | ADGRG2 | TGFBR2 | SPAG11B | C11orf87 | RBPJ | N4BP2L1 | CEP192 |
| KBTBD7 | FGF18 | GPATCH2L | C1orf112 | TAT | MKX | NFIB | SLC7A6 | TNKS2 |
| RAB22A | CCL1 | SKI | ZNF367 | FBXO46 | GLYR1 | XKR6 | HSD17B7 | MMD |
| PFKM | PLEKHA1 | MALT1 | TGFBI | MAPRE1 | PTPN14 | ALX1 | IRAK1BP1 | MFSD10 |
| DMRTC1B | RSAD2 | ZBTB41 | SKP2 | ULBP3 | CD97 | ZFP36L2 | ALDH1A1 | RNGTT |
| TADA2A | YOD1 | NKIRAS1 | RTN4 | ATF7IP | EGR3 | ACVR1C | PDAP1 | NR3C1 |
| GMFB | PELI1 | KDM7A | PDCD4 | RASSF8 | PANK3 | THRB | VSNL1 | H2AFY |
| HRK | ARMCX1 | HSD17B4 | RECK | CENPQ | DNAJA2 | FBXO11 | INPP4A | HDAC1 |
| ARMC10 | MATN2 | AKAP12 | BCL7A | CALN1 | FHDC1 | SRL | SLC9A6 | LGALS8 |
| JHDM1D | NTF3 | ANGPTL5 | PLAG1 | AMER1 | UBN2 | CSRNP3 | CFL2 | UCHL3 |
| GRAMD3 | TIMP3 | BCL11B | NIPAL1 | ZNF576 | RSRC2 | NAA50 | CLIP4 | DENND4C |
| C10orf12 | BEST3 | FAM3C | KLHL15 | HNMT | AP5M1 | LEMD3 | ATRNL1 | ZNF280D |
| ERG | SMAD7 | MEI4 | ANKRD46 | IPO11 | MYCL | STAT3 | RTKN2 | IFI44L |
| CNTFR | MSH2 | EPM2A | HNRNPK | GALNT12 | TRPM7 | ZSWIM6 | PRRC1 | DUSP5 |
| BBIP1 | SATB1 | SYT15 | BMPR2 | MXD3 | KCNK10 | RASA2 | ESYT2 | SUMF1 |
| PSRC1 | PHF14 | CFAP300 | PRKCE | CRTAM | RDX | PAG1 | G2E3 | GIGYF1 |
| XKR8 | FAM13A | KDM1B | UBE2D1 | DDAH1 | MARCH6 | SLC8A3 | MTPN | EML3 |
| FAM46A | RP2 | GRAMD2B | STK38L | RBM17 | FCHO2 | KLHL42 | ZNF99 | SREK1IP1 |
| ZBTB47 | ARHGAP24 | C7 | NCAPG | EML6 | MEIS1 | ADNP | SC5D | GABPA |
| SESTD1 | UBE2D3 | RNF103 | DAG1 | FAM20B | RHOB | NFIA | PPARA | SLC16A1 |
| RBM22 | PPP1R3B | LTV1 | PTPN4 | TC2N | GNG12 | PIK3R1 | GLDN | DCK |
| SRSF3 | LRRC57 | ANKS1B | APAF1 | DSC2 | EXTL3 | WWP1 | POLR3B | UBE2Q1 |
| AP1AR | DUSP8 | PPP1R3D | DENND1B | EIF2S1 | LMBR1 | ZNF704 | NCOA2 | B2M |
| CCL22 | SOX5 | RAD51AP1 | PTEN | CERS5 | MSL1 | SOCS6 | TAF5 | VWCE |
| VTA1 | RMND5A | CLDN8 | SERPINB5 | SMURF2 | COQ10B | FRS2 | IST1 | SEPT2 |
| ARHGEF12 | PDZD8 | ATXN10 | TOPORS | ITIH5 | GXYLT1 | VASH2 | THPO | PPM1D |
| PRRG4 | OLR1 | MCMDC2 | DERL1 | LGR6 | SASH1 | LIFR | PRPF39 | BCL2 |
| MAPK10 | SLC2A4RG | ITCH | PPIF | ANKRD37 | XKR4 | KLF6 | TMEM163 | IQCB1 |
| NELL2 | SPRY1 | NPPB | RPS7 | CDK2AP1 | DCUN1D3 | CADM2 | ADAMTS3 | UGT8 |
| SOX2 | S100A10 | CLIC2 | BASP1 | REPS1 | PLD1 | GATAD2B | NEK11 | ZNF518A |
| ZBTB8A | RALGPS2 | OLFM3 | PLOD3 | DIRAS2 | MCAM | FGD4 | PHF6 | MROH1 |
| PVRL3 | GLIS2 | USP15 | TM9SF3 | TMED10 | CREBL2 | MSX1 | LYRM7 | SETD2 |
| EIF4EBP2 | KLF5 | MAST4 | SPATS2L | LCORL | KCNA1 | SMARCD1 | KIN | C5orf24 |
| CNOT8 | SPRY2 | KCNJ10 | PDHA2 | RIPOR2 | CDK6 | MIA3 | POM121 | KRT5 |
| RAD21 | ELF2 | NIPAL2 | DAXX | IQCH | NBEA | ZCCHC3 | B3GAT2 | TET3 |
| PI15 | PCBP1 | TPRG1L | JMY | ZNF680 | SEMA3A | CBX4 | PGM1 | ZNF567 |
| CCR7 | SLC16A10 | ARL1 | TGFBR3 | CETN1 | TMEM260 | TAGAP | LAMA4 | ZNF107 |
| SLC10A7 | ST3GAL6 | LPA | TP53BP2 | IGF2BP3 | TNKS | RASEF | EFNA1 | MT-CYB |
| NPAS3 | KBTBD6 | CUX1 | TP63 | DDX55 | AP3M1 | JPH1 | MATR3 | MT-ND2 |
| MARCH5 | PPP1R3A | LATS1 | IGFBP3 | LIX1L | DNAJB14 | FBXO28 | CCDC121 | MT-CO1 |
| NUDT5 | PITX2 | FDX1 | WFS1 | STK3 | CD47 | MBNL1 | PGRMC2 | MT-ATP6 |
| SPG20 | STAG2 | MINDY2 | TPM1 | DNM1L | ATXN3 | EPHA4 | CALCB | MT-CO3 |
| VHL | CD69 | BCL11A | MT-ND5 | KIAA0825 | C17orf102 | UBR3 | PM20D2 | ZSWIM8 |
| RPRD1A | TRAPPC8 | SPEF2 | VEZT | CASTOR1 | ABCD2 | NEGR1 | ZNF592 | RBM12 |
| CHD7 | CPEB3 | PLAA | CASP2 | CTSC | SNX19 | VCL | PREX2 | DDX1 |
| BOLL | PCSK6 | MED21 | MT-ND4 | LRRIQ3 | WNT2B | BTG2 | DEPDC4 | BIRC3 |
| RPP25 | SESN1 | FRMD3 | SLC38A2 | BRCC3 | TSPAN2 | TESK2 | SEZ6L | LEPROTL1 |
| ABHD10 | PCBP2 | TENT5A | TXNIP | ARFRP1 | MAP3K8 | COL4A1 | SLC17A5 | SMG9 |
| IL6ST | GLCCI1 | KHDC1 | RGS1 | DNAJB9 | ANKRD33B | CDC25A | SP100 | CD83 |
| RYBP | GABRB2 | CDH7 | PKNOX1 | SUV39H2 | ACBD5 | MBNL3 | MYO5B | COPS5 |
| HSPA13 | LANCL1 | DLGAP1 | GOLGA4 | C5orf58 | NETO2 | AKIRIN1 | CTR9 | ERAL1 |
| GTPBP1 | PAN3 | KHDC1L | RFX7 | CLIC5 | MEGF9 | CCL20 | TBL1XR1 | CCNH |
| MICALL1 | ST6GAL1 | ZDHHC17 | MYO5A | TNPO1 | RNF24 | PIKFYVE | GIMAP5 | IL6 |
| FAM63B | ASF1A | PTPN20 | MEF2A | SACM1L | FAM126B | AIF1L | INTS6 | PHOSPHO2 |
| ESM1 | PBRM1 | SOS2 | SRSF11 | AMBN | THBD | TET1 | ARHGAP32 | NFKBIZ |
| POC1B | JAG1 | BBS12 | FBXL3 | NOP14 | CCDC171 | SOWAHC | HIC2 | ACRC |
| C8orf44-SGK3 | ARMCX5-GPRASP2 | RAD51L3-RFFL | GIMAP1-GIMAP5 | RP11-766F14.2 | RNF111 | PDZD2 | PIGG | CXCL3 |
| RAVER2 | CHIC1 | ATP2B4 | BOD1L1 | CA1 | BRWD3 | AGO4 | CEP97 | GEM |
| FGF7 | TMEM170A | EDIL3 | SIKE1 | RNF180 | MRPL45 | IL6R | ZNF200 | CXCL8 |
| MICALCL | DCAF7 | ING3 | SEC61A1 | TMEM246 | MAPK1 | GPC4 | SLC22A15 | METTL7B |
| RFFL | HIPK3 | FANCC | SLC2A3 | ADGRE5 | PYGO1 | RASA1 | CPNE4 | CTPS1 |
| KPNA4 | TIAM1 | GNAQ | ASPM | ZNF326 | IFFO2 | ROBO2 | CRYBG2 | UCP2 |
| ROR1 | OSR1 | KIF6 | DDX3Y | GPRASP2 | MTAP | HGF | PLP1 | DENND5A |
| PURG | MAP3K1 | FKBP14 | LAPTM4A | ELOVL7 | NIPBL | ALX4 | ST8SIA3 | IFIT1 |
| MCMBP | HNRNPU | DIPK2A | WWC2 | PDE3A | SNTB2 | MTMR12 | ITGB8 | EFCAB7 |
| FTO | KLF12 | AKAP6 | FANCM | MPRIP | ZADH2 | KLF3 | CLTRN | CHUK |
| CDKN2C | SAMD8 | MAP10 | CD1A | PRICKLE2 | TIGD2 | RASGRP1 | NSL1 | E2F3 |
| MTHFD1 | GID4 | SGO1 | PTPRG | TNFAIP3 | TNS1 | SCML2 | RNF2 | PCGF5 |
| CMC1 | PRPF4B | GRM1 | LILRB4 | CRIM1 | RPS6KA3 | BNC2 | RASAL2 | NTRK2 |
| CYB5R4 | YAP1 | TFDP1 | TLR4 | ACVR2A | FOXP2 | BAHD1 | PRMT9 | EXTL2 |
| CADM1 | GTPBP10 | GAPT | PRR5L | LZTFL1 | AAK1 | SOX7 | SLC35F5 | NR2C2 |
| BCAS3 | RAB11A | PDLIM5 | KCTD18 | LCOR | DNAJC16 | SLC30A10 | ZNF728 | SAMD9 |
| TLK2 | FMN1 | ABCD3 | ARHGEF7 | DST | TNPO3 | GAB1 | LUM | APH1B |
| FZD8 | NFAT5 | ZNF527 | HAX1 | EHD1 | SPRY4 | CREBRF | MKNK2 | GPR34 |
| METAP1 | RETSAT | SCN8A | SGK3 | TRIP11 | FOXP1 | STK40 | RAPGEF6 | ABCA1 |
| KAT6A | BMP3 | CATSPERE | MAP3K2 | PID1 | WNK3 | PURB | FOXO3 | RASSF6 |
| FOXG1 | STRN | ANXA1 | ZNF35 | FAT3 | AGO2 | CNOT6 | NRXN3 | ZNF217 |
| SPPL3 | UNC80 | LANCL3 | COX15 | SUZ12 | SOX6 | SCRN1 | GP9 | RNF32 |
| SEMA3E | TBX2 | GCLM | FXR1 | SPDYA | NHS | MEF2C | FGF1 | DLX2 |
| TENM4 | TNRC6B | EPM2AIP1 | FASTKD2 | GCNT2 | PTPN9 | TGFB2 | ZGRF1 | ZXDA |
| FAM107B | C17orf75 | ATP11B | FAM177B | MAN1A2 | SNX11 | RBMS3 | SLC5A7 | ZNF805 |
| SESN3 | PAIP2B | LRP6 | MAP2K3 | SETD9 | FYN | PDHA1 |  |  |

| Target genes for *hsa-let-7a-5p* | | | | | | | | |
| --- | --- | --- | --- | --- | --- | --- | --- | --- |
| CCL3L1 | PIK3IP1 | PBX3 | EEF2K | IFI44L | KCTD16 | BCL7A | DAPK1 | IGF2BP1 |
| KPNA5 | SPATA2 | AMT | MTDH | RNF44 | AGO3 | RBFOX1 | SYT1 | NR6A1 |
| GPR63 | SBNO1 | SOCS4 | B4GAT1 | PDP2 | EPHA3 | GALNT4 | EHF | ARID3B |
| CASP5 | SRD5A3 | RBFOX2 | MAPK8 | CD200R1 | ZNF587 | COL14A1 | SEMA4F | FIGN |
| IKBKAP | ZNF322 | ASAP1 | ATP2A2 | STXBP5 | RPUSD2 | WNK3 | NIPA1 | PGRMC1 |
| CYP46A1 | ZNF354A | PLXNC1 | DNAJA2 | TTL | WDR41 | MYO1F | RNF115 | CCND2 |
| CD86 | B3GAT3 | DDX19B | FASLG | GDPD1 | LSM11 | GPR132 | SLC17A2 | NME6 |
| BMP5 | RBMS2 | BEGAIN | RAB8B | TSC22D2 | PKD1L2 | PLEKHG7 | CYB561D1 | UTRN |
| PXMP4 | KCNC2 | HSPA14 | ACSL6 | RCN1 | MIEF1 | TRIB2 | ZNF443 | SKIL |
| CDH22 | MARCH9 | CNOT6L | GALNT1 | AMER3 | C2 | ICMT | ST8SIA1 | YOD1 |
| GSG1L | STARD13 | THOC2 | UHRF2 | DPP3 | RAB15 | PDGFB | KIAA0895 | GXYLT1 |
| RNF7 | HMGA2 | FAM122A | TRANK1 | A1CF | MXD1 | CACNA1I | MAP3K3 | LPGAT1 |
| ZNF391 | IGDCC3 | GALC | VIRMA | ZBTB10 | MEX3A | VASH2 | RBM38 | IGF1R |
| C6orf211 | FIGNL2 | DPP6 | MEF2C | TRMT13 | KMT2D | RORC | PDXDC1 | AGO4 |
| CACFD1 | PRTG | KLHDC8B | ARID3A | TXLNG | OLFM4 | CDCA8 | CYTH3 | C5orf51 |
| LRRC20 | LIN28B | CARNMT1 | GTF2I | MTUS1 | ARMC8 | ESRP2 | GJB4 | HAND1 |
| SLC6A1 | C14orf28 | PLXND1 | GABBR2 | MAP4K4 | LHCGR | GABRA6 | CAPN3 | PCGF3 |
| CCDC144A | TRIM71 | IL13 | TECPR2 | HMGA1 | SLC1A4 | GFOD1 | POM121L12 | PBX2 |
| ARHGAP20 | SMARCAD1 | KCTD17 | RANBP2 | SYNCRIP | ATG10 | SLC16A14 | SEC14L5 | RGS16 |
| PRKAB2 | PTAFR | HIP1 | STARD9 | NAT8L | ERGIC1 | CSRNP3 | SOCS7 | ERCC6 |
| PTPRU | NPHP3 | PALD1 | ARL5A | ZNF10 | PPT2 | KHNYN | UGT3A1 | MAPK6 |
| KCTD10 | FRMD4B | LIMD2 | GPATCH2 | FBXO30 | RRM2 | APH1A | SNAI3 | GALNT2 |
| PIAS4 | NAP1L1 | CD59 | PLPP6 | EIF2S2 | STEAP3 | TET2 | OSM | RDX |
| MEF2D | CBX5 | SRGAP1 | PLEKHO1 | NOL4L | USP49 | FAM118A | PPP1R12B | USP24 |
| VPS26B | SLF2 | KCTD21 | ERCC4 | DICER1 | KATNBL1 | CBFA2T3 | YY1 | SPRYD4 |
| GNAL | SALL4 | GJC1 | MASP1 | TSC1 | TEPSIN | FAM120C | PRDM2 | INSR |
| SPRED3 | ADAMTS15 | MRS2 | PARPBP | CANT1 | GPX7 | GOLGA6L9 | ZNF799 | CD164 |
| TNIK | MIB1 | MYCN | FGD6 | AMMECR1L | MECP2 | PDLIM7 | SLC45A4 | EDEM3 |
| EZH1 | PAPPA | STIMATE | ACVR2A | GALE | SOX13 | NKIRAS2 | CTHRC1 | IRS2 |
| SNX17 | CDC34 | FZD4 | ARMT1 | GGA3 | EPB41 | IL6 | CHST3 | DCAF15 |
| EDA | SLC10A7 | FNDC3A | ABL2 | TRPM6 | ANKRD49 | GAB2 | NID2 | LRIG2 |
| ATP2B3 | SFMBT1 | ERO1A | TBKBP1 | ADRB1 | CALU | CLASP2 | MOB1A | DUSP1 |
| SEMA4C | LRIG3 | PLEKHG6 | IKZF2 | ZNF652 | SYT11 | DUSP7 | CRTAP | EPHA4 |
| TRIOBP | ZNF512B | GAN | RICTOR | SDR42E1 | ITGB8 | TUT4 | NEFM | GOLT1B |
| JOSD1 | NRAS | LBR | CRTAM | LRTOMT | SPEG | FRMD5 | RDH10 | WDR37 |
| RAB22A | ZNF710 | HDLBP | POGZ | NLRP2B | STX17 | POLQ | ODF2L | SCD |
| NKAP | PPP1R15B | FGF11 | E2F2 | SIGMAR1 | TXNDC8 | SH2B3 | ADAM28 | MMS22L |
| KIAA1467 | USP44 | CASP3 | MBD2 | KLHL6 | TRABD | CTPS2 | RRP1B | P4HA2 |
| KCNC3 | BACH1 | SLC38A9 | SNX16 | TNFRSF1B | THRB | ANKRD28 | FAM180A | ZBTB39 |
| ITGA1 | ZSWIM5 | RNF20 | ACER2 | MAP3K2 | C1GALT1 | HABP4 | TNFSF10 | DPH3 |
| SAP30L | DLC1 | ACTA1 | ABCB9 | FOXP2 | AURKB | C15orf41 | RAB11FIP2 | RAB3GAP2 |
| HECTD4 | CCNJ | TMEM167A | UGCG | SLK | GHR | RAMAC | HK2 | PGM2L1 |
| NEDD4L | ZBTB5 | ABT1 | C19orf47 | SCN5A | RNF217 | MAN2A2 | FRS2 | GRPEL2 |
| DNAH10OS | STX3 | PPP1R16B | AMOT | USP12 | CIAO2A | VPS33A | IDH2 | BCAT1 |
| TMEM135 | FZD3 | PLPP5 | FAM214B | KCNQ4 | SURF4 | RUNX1T1 | BTN2A1 | SMARCC1 |
| MTMR3 | C8orf58 | OPA3 | SESTD1 | CUX1 | GAREM1 | FAM122C | MYO5B | MSN |
| SNX1 | ZNF644 | DNAJC1 | KIAA0930 | ARPP19 | SPRYD7 | TRHDE | HELZ | FBXO45 |
| GPC4 | SMIM3 | ZNF784 | ABCC5 | HIF3A | AIFM1 | TP53 | FOPNL | RBMS1 |
| DNAL1 | CLDN12 | ZNF275 | C18orf21 | DCUN1D3 | SH3RF3 | CFL2 | PANX2 | ZDHHC23 |
| KIAA1244 | PXT1 | GPR26 | RNF165 | ZC3H3 | STON2 | WIPI2 | CAP1 | THBS1 |
| ANKRD33B | NIPAL4 | FBXL12 | PLAGL2 | HOXA9 | SPPL2B | ANKRD46 | DARS2 | CBX2 |
| LPHN3 | COIL | LIN28A | SCN11A | MYRIP | CLDN1 | DYNC2LI1 | KLK10 | BCAP29 |
| CTIF | GNPTAB | MED8 | VAV3 | IL10 | TMX4 | ZCCHC10 | ARMC9 | BTG2 |
| CTB-54O9.9 | ADAMTS8 | PLA2G3 | C20orf194 | PRKAA2 | SAMD12 | SFT2D3 | KRT5 | ZNF566 |
| CHRFAM7A | ADRB2 | AEN | HOXD1 | SESN3 | UGGT1 | GPIHBP1 | C19orf84 | TPP1 |
| WNT1 | THRSP | LIPH | XK | ARHGEF15 | SLC31A1 | FAM20A | RGPD8 | DYRK2 |
| FAM155A | TET3 | SLC31A2 | NME4 | TMED5 | LMLN | REEP1 | PIK3CA | RPS6KA3 |
| PRSS22 | CLCN5 | AGAP1 | FNIP2 | GPAT4 | LIMD1 | POU2F1 | MED6 | MFSD4 |
| AP1S1 | COL3A1 | ELP1 | MEIS2 | ZNF341 | POTEM | CRK | RGPD6 | CPEB4 |
| PSORS1C2 | BIN3 | ZNF583 | TMEM121B | TRIB1 | STAG3 | PLCG2 | GPAT3 | ZNF451 |
| PARD6B | SLC35D2 | SCN4B | XYLT1 | PALM3 | LBH | WARS2 | FBXO22 | SMARCD1 |
| SLC5A9 | ATP8B4 | GPCPD1 | DIP2A | HECTD2 | ETNK2 | LYVE1 | EXOC6B | IRGQ |
| SMC1A | CPA4 | RGS6 | STARD3NL | VSNL1 | SMCR8 | NUDT15 | MGLL | AP3M1 |
| HIC2 | TGFBR3 | HDX | RFX6 | CEP63 | MSI2 | SPTBN4 | NEXMIF | TTC17 |
| SLC25A27 | ONECUT2 | HIF1AN | CDC25A | PACS2 | NUGGC | DAGLA | MDFI | SREK1 |
| ARL4D | IGF2BP3 | COL4A1 | DDTL | KLHL23 | CPED1 | PLCB4 | ICOS | HIPK2 |
| PIGA | STK40 | EFHD2 | DUSP22 | PARM1 | FCAR | VGLL3 | CCNY | C5orf30 |
| BZW2 | MAP4K3 | COL27A1 | CPEB3 | SLC25A18 | ARHGAP12 | CASKIN1 | KREMEN1 | NLK |
| SLC25A24 | DLST | NYNRIN | ZCCHC9 | INTS2 | ZNF641 | CPM | COL9A1 | ZFYVE20 |
| NKD1 | ADRB3 | XKR8 | NPEPL1 | DDX31 | SYT7 | PAX3 | RGPD5 | TMTC3 |
| CLP1 | SLC16A9 | HOXA1 | KLHL31 | CDV3 | GPATCH3 | MMP11 | DST | ERGIC2 |
| SOWAHA | AHCTF1 | MAP3K9 | MFSD4A | NEMP1 | POLR3A | ARHGAP8 | RFX5 | FCHO2 |
| TSPEAR | DTX4 | IQCB1 | CNTRL | CYP4F2 | ZNF268 | RNF38 | EPPIN | MTF2 |
| TGDS | DNA2 | SALL3 | FNDC3B | ADAMTS6 | ATAD2B | EPHB1 | TENM2 | PMAIP1 |
| ERP29 | PTPRD | BEND4 | DCUN1D2 | ERVH48-1 | DUSP16 | ZNF215 | DAPK2 | DIP2B |
| TMEM143 | PLEKHA8 | PCDH19 | TMEM234 | KIF21B | CCND1 | MYCBP | GAB3 | PFKFB2 |
| ARHGAP28 | DMD | SIGLEC5 | ARG2 | ANKFY1 | PLD5 | TMEM144 | PPP3CA | TAOK1 |
| RALB | SENP2 | COL4A6 | YPEL2 | SEMA3F | TSPAN2 | FBXO32 | STARD4 | JMY |
| SLC20A1 | PEX11B | GFM2 | PRPF38B | BRWD3 | SLC7A14 | GOLGA4 | IKZF3 | TTLL11 |
| STOX2 | MARS2 | KCNJ11 | TMC7 | GOLGA6L4 | PUDP' | SYT2 | INPP5A | ZNF57 |
| ARRDC4 | TMPRSS2 | TMOD2 | SNX30 | SLC12A9 | STRN | IFNLR1 | ENAM | HOXD10 |
| ELF4 | FRAS1 | GCNT4 | GYG2 | PPARGC1B | MEIS3 | ELK4 | NSD1 | TAF5L |
| PPP2R2A | GAS7 | NKAPD1 | MAP3K1 | MYORG | TMEM178B | TEX261 | TSPYL5 | ZNF264 |
| OSBPL3 | ARHGEF38 | COL4A3BP | ESR2 | SECISBP2L | SLC52A3 | GDAP2 | ESPL1 | MTPN |
| SSH1 | EDN1 | SIGLEC14 | BSN | POLR2D | PKN2 | UBE2K | MUC5AC | ATP6V1F |
| UBE2G2 | FAM189A1 | C15orf39 | SLC22A23 | LTN1 | BRD3 | ZNF792 | TMED4 | SPINT1 |
| BTBD9 | ZNF280B | APBB3 | ZNF689 | NDST2 | KRTAP5-8 | SULF2 | RASA4 | AKAP8 |
| AKAP6 | DTX2 | OSMR | CCDC71L | GRID2IP | GIPC1 | RNF5 | SCGB2B2 | KLHL42 |
| PLD3 | GDF6 | FAXC | ABHD17C | RMI2 | ATP6V1G1 | OSTF1 | PTPRO | H2AFV |
| MOB4 | WNT9B | DDX19A | HTR1E | SEC14L1 | AGO1 | LMX1A | EGR3 | PLK2 |
| GALNT15 | USP38 | ENTPD7 | EIF4G2 | FARP1 | ANKRD52 | CLOCK | KCNJ3 | PLAG1 |
| LOXL4 | ZBP1 | POLR3D | PRKAR2A | TREML1 | FKRP | IFT80 | GABPA | C6orf120 |
| RAB40C | CPEB1 | SUB1 | POGLUT1 | FMO4 | RNF170 | ZNF318 | DYRK1A | ARL5B |
| SUCLG2 | MDM4 | SLC5A6 | HOOK1 | PLXNA4 | TUSC2 | PPARA | BCL2L1 | DPF2 |
| PLEKHH1 | TTLL4 | IMPG2 | TXLNA | OLR1 | NRARP | GPR156 | L2HGDH | C1orf21 |
| SNN | TSEN34 | ATL2 | KIAA1958 | WDFY3 | ZNF763 | BBX | SBK1 | UBE4B |
| P2RX1 | RASGRP1 | RAB11FIP4 | SERF2 | PNKD | RTL9 | CNOT6 | AGBL2 | DUSP18 |
| KIAA1549 | RUFY3 | CDKN1A | SEMA4G | ABHD14B | SOCS1 | SREK1IP1 | MGA | PATL1 |
| CRY2 | TMEM65 | NGF | RSPO2 | PARS2 | SCYL3 | DKK3 | SMAD2 | DENND6A |
| KCNC1 | TGFBR1 | IGF2BP2 | SLC30A4 | TAB2 | LIMK2 | COL1A1 | ZNF548 | UBE2W |
| CPSF4 | PXDN | TNFSF9 | LIPT2 | CRB2 | DOCK1 | BRWD1 | SLC8A2 | CUL1 |
| ZNF516 | TRIM67 | LINGO1 | COL5A2 | ADGRL3 | GLRX | SMIM13 | KRT78 | TSR1 |
| TEAD3 | COL4A2 | SLC2A12 | PRLR | ZNF200 | MFSD8 | CREB3L2 | GRAMD1B | SSH2 |
| CACNB4 | LAMP2 | CLDN16 | TRIM41 | DLGAP4 | NOVA1 | TMEM41A | SNX6 | SMAD7 |
| KLF9 | CPEB2 | ZBTB8B | MED28 | ZNF697 | CEP164 | ECHDC1 | LCE2D | EIF4EBP2 |
| ADAMTS5 | COL1A2 | LEPROTL1 | PRRX1 | CHSY3 | DOK3 | CDKAL1 | SKIDA1 | MED13L |
| USP6 | ITGB3 | DVL3 | PARP8 | STK24 | SOGA3 | ACTR10 | ZNF432 | ATXN7L3B |
| RAG1 | BZW1 | NEK3 | MSR1 | DMP1 | ZBTB8OS | SYNC | CHRD | PDZD2 |
| HTR4 | CEMIP2 | CCL7 | GRAMD2B | IL22RA1 | YTHDF3 | ATP2B4 | TRIM33 | ASH1L |
| APBA1 | HAS2 | PDPR | PCDH20 | MAPK9 | ABHD18 | AGBL1 | ERO1L | RNF26 |
| CCDC141 | NHLRC3 | STRBP | PITPNM3 | ZNF512 | ETNK1 | TBX5 | CTPS1 | CRAMP1L |
| MBTPS2 | FAM135A | ANKRA2 | C6orf203 | RBM19 | MUC4 | ZNF311 | GATM | ELAVL1 |
| SEC31B | IGDCC4 | KDM3A | PQLC2 | SLC9A9 | SOX6 | DMRT2 | GNG5 | FLCN |
| LDB1 | DDI2 | DHX57 | SMUG1 | TSPAN18 | ELOVL4 | ARID1B | PDE12 | RAB3IP |
| AFF2 | B3GNT7 | TAF9B | KATNAL1 | CGNL1 | PRDM1 | NRK | E2F5 | BAZ1A |
| DOCK3 | ACVR1C | PEG10 | CCR7 | UTY | SP8 | HS2ST1 | PRDM5 | EIF3D |
| MGAT4A | PBX1 | POLL | LRFN4 | OTOF | LRRC8B | GRIN3A | EEA1 | RNASEH2B |
| PLCXD3 | XRN1 | CERCAM | CRCT1 | CHIC1 | BTBD3 | AAK1 | RB1 | AKIRIN1 |
| KLF8 | CEP135 | CEP120 | INTS6L | KPNA1 | SNAP23 | MON2 | ATP6V1C1 | CNNM3 |
| CHD4 | FNIP1 | FAM104A | IGF1 | NTRK3 | FREM2 | FOXN3 | RNMT | MSL2 |
| SREBF2 | ZFYVE26 | SENP5 | EOGT | PAG1 | ZNF197 | OPRM1 | SERPINB9 | MSANTD2 |
| LCORL | TMPPE | CADM2 | SMAP1 | KLHL13 | BRF2 | ZNF202 | ADIPOR2 | NAA30 |
| USP32 | E2F6 | SDK1 | CCNT2 | AK3 | TTC14 | CACNA1E | MLLT10 | EGLN2 |
| POC1B-GALNT4 | EPPIN-WFDC6 | RP11-766F14.2 | PHOSPHO2-KLHL23 | HSPE1-MOB4 |  |  |  |  |

| Target genes for *hsa-mir-100-5p* | | | | | | | | |
| --- | --- | --- | --- | --- | --- | --- | --- | --- |
| RASGRP3 | RRAGD | FZD8 | BAZ2A | ATP11C | ZNF197 | HES7 | FKBP5 | CPEB4 |
| CLDN11 | CYP26B1 | TRIB2 | NOX4 | CTDSPL | RMND5A | TMPRSS13 | HS3ST2 | ZNF483 |
| ZBTB7A | BMPR2 | ZZEF1 | HS3ST3B1 | MBNL1 | LRRC8B | DESI2 | PPP3CA | B3GNT2 |
| TMEM135 | FZD5 | TAOK1 | ETFDH | PRDM1 | HOXA1 | RASA2 | AP1AR | OLFM2 |
| ST5 | EPDR1 | THAP2 | NR6A1 | ADCY1 | TRIM71 | CAMTA1 | GLI1 | DENND4C |
| PPP1CB | KBTBD8 | ZNRF2 | TTC39A | MTMR3 | RAP1B | CDC25A | RCBTB1 | TSPYL2 |
| NXF1 | SMARCA5 | AGO2 | PCSK9 | ZADH2 | PPFIA3 | CDYL2 | GMPS | TRIB1 |
| SLC44A1 | MTOR | RAVER2 | FGFR3 | ST6GALNAC4 | RNF144B |  |  |  |

| Target genes for *hsa-let-7f-5p* | | | | | | | | |
| --- | --- | --- | --- | --- | --- | --- | --- | --- |
| ERO1L | COIL | AHCTF1 | HDX | XYLT1 | USP12 | CALU | SLC16A14 | ZNF202 |
| CPEB4 | RFX6 | DTX4 | HIF1AN | CCR7 | KCNQ4 | SYT11 | CSRNP3 | CACNA1E |
| ZNF451 | RAB11FIP4 | DNA2 | COL4A1 | KLF9 | CUX1 | SOWAHA | KHNYN | MSANTD2 |
| PFKFB2 | HOXA1 | PTPRD | EFHD2 | DIP2A | ARPP19 | ITGB8 | CRY2 | PSORS1C2 |
| SMARCD1 | NRAS | PLEKHA8 | COL27A1 | STARD3NL | HIF3A | SPEG | CPSF4 | DAPK1 |
| IRGQ | SMARCAD1 | DMD | NYNRIN | CDC25A | DCUN1D3 | STX17 | APH1A | SYT1 |
| CTPS1 | IQCB1 | SENP2 | XKR8 | DDTL | ZC3H3 | TXNDC8 | TET2 | EHF |
| TTC17 | SCYL3 | PEX11B | AP1S1 | DUSP22 | HOXA9 | TRABD | FAM118A | SEMA4F |
| AP3M1 | MIB1 | MARS2 | SALL3 | CPEB3 | MYRIP | THRB | CBFA2T3 | NIPA1 |
| ATP6V1G1 | GALC | TMPRSS2 | BEND4 | ZCCHC9 | IL10 | C1GALT1 | FAM120C | RNF115 |
| S100PBP | KLHL23 | GAS7 | PCDH19 | NPEPL1 | PRKAA2 | AURKB | GOLGA6L9 | SLC17A2 |
| C5orf30 | TRIM41 | ARHGEF38 | SIGLEC5 | KLHL31 | SESN3 | GHR | PDLIM7 | CYB561D1 |
| SREK1 | SLC5A6 | EDN1 | COL4A6 | SRD5A3 | GALNT15 | CIAO2A | NKIRAS2 | ZNF443 |
| NLK | ELOVL4 | FAM189A1 | GFM2 | MFSD4A | ARHGEF15 | GAREM1 | BZW2 | KIAA0895 |
| ZFYVE20 | FNDC3A | ZNF280B | KCNJ11 | CNTRL | MOB4 | SPRYD7 | IL6 | MAP3K3 |
| HIPK2 | HOOK1 | DTX2 | TMOD2 | FNDC3B | GPAT4 | AIFM1 | GAB2 | BTBD9 |
| TMTC3 | FAM135A | GDF6 | GCNT4 | DCUN1D2 | ZNF341 | SH3RF3 | BZW1 | RBM38 |
| FCHO2 | PDGFB | WNT9B | PRSS22 | TMEM234 | FBXO45 | APBA1 | ARL4D | PDXDC1 |
| MTF2 | KLK10 | USP38 | NKAPD1 | ARG2 | TRIB1 | STON2 | DUSP7 | PRDM1 |
| ERGIC2 | CADM2 | ZBP1 | COL4A3BP | YPEL2 | PALM3 | SPPL2B | TUT4 | CYTH3 |
| PMAIP1 | PITPNM3 | CPEB1 | SIGLEC14 | PRPF38B | VSNL1 | TMX4 | FRMD5 | CAPN3 |
| ATP6V1C1 | NOVA1 | MDM4 | APBB3 | TMC7 | CEP63 | SAMD12 | SURF4 | POM121L12 |
| JMY | ZBTB5 | TTLL4 | OSMR | SNX30 | PACS2 | UGGT1 | POLQ | SEC14L5 |
| TTLL11 | LRRC8B | TSEN34 | FAXC | GYG2 | LCORL | SREBF2 | SH2B3 | SOCS7 |
| SSH2 | ST8SIA1 | RASGRP1 | DDX19A | MAP3K1 | PARM1 | SLC31A1 | CTPS2 | UGT3A1 |
| TAF5L | KCTD16 | RUFY3 | ENTPD7 | TRMT13 | SLC25A18 | LMLN | ANKRD28 | SNAI3 |
| DIP2B | MAP3K2 | FRAS1 | POLR3D | ESR2 | IFI44L | LIMD1 | HABP4 | LDB1 |
| HOXD10 | TRIM67 | TMEM65 | SUB1 | AKAP6 | INTS2 | POTEM | C15orf41 | OSM |
| MTPN | RBFOX1 | TGFBR1 | IMPG2 | BSN | DDX31 | STAG3 | RAMAC | YY1 |
| ZNF264 | SDK1 | PXDN | ATL2 | SLC22A23 | CDV3 | LBH | MAN2A2 | PRDM2 |
| ATP6V1F | PPP1R12B | COL4A2 | ELF4 | PIGA | NEMP1 | ETNK2 | VPS33A | ZNF799 |
| PLK2 | MAP3K9 | LAMP2 | SLC25A27 | ZNF689 | CYP4F2 | SMCR8 | RUNX1T1 | SLC45A4 |
| KLHL42 | DNAJA2 | CPEB2 | CDKN1A | ZNF587 | ADAMTS6 | MSI2 | FAM122C | CTHRC1 |
| H2AFV | ZNF652 | COL1A2 | NGF | CCDC71L | NKD1 | NUGGC | TRHDE | CHST3 |
| C6orf120 | TMED5 | ITGB3 | IGF2BP2 | ABHD17C | ERVH48-1 | CPED1 | TP53 | NID2 |
| DUSP18 | RNF217 | CLP1 | TNFSF9 | HTR1E | KIF21B | ATP2B4 | CFL2 | MOB1A |
| UBE4B | SNX16 | CEMIP2 | LINGO1 | EIF4G2 | ANKFY1 | ARHGAP12 | STAT2 | CRTAP |
| UBE2W | RIOK3 | HAS2 | SLC2A12 | PRKAR2A | SEMA3F | CCDC141 | ANKRD46 | NEFM |
| PATL1 | DDX26B | DDI2 | CLDN16 | POGLUT1 | BRWD3 | ZNF641 | DYNC2LI1 | RDH10 |
| TSR1 | ZBTB37 | B3GNT7 | ZBTB8B | TXLNA | GOLGA6L4 | SYT7 | ZCCHC10 | ODF2L |
| CUL1 | TIMM17B | ACVR1C | LEPROTL1 | KIAA1958 | SLC12A9 | GPATCH3 | KCNC1 | ADAM28 |
| MED13L | GPR157 | PBX1 | DVL3 | SERF2 | PPARGC1B | POLR3A | SFT2D3 | RRP1B |
| SMAD7 | CACNG4 | XRN1 | NEK3 | SEMA4G | MYORG | ZNF268 | GPIHBP1 | FAM180A |
| RNASEH2B | BLOC1S6 | CEP135 | CCL7 | RSPO2 | SECISBP2L | ATAD2B | FAM20A | TNFSF10 |
| ASH1L | CHUK | FNIP1 | PDPR | SLC30A4 | POLR2D | DUSP16 | PLCXD3 | RAB11FIP2 |
| ATXN7L3B | LGR4 | ZFYVE26 | STRBP | LIPT2 | LTN1 | CCND1 | REEP1 | P2RX1 |
| PDZD2 | COL24A1 | TMPPE | KDM3A | COL5A2 | NDST2 | PLD5 | POU2F1 | HK2 |
| PLAG1 | C9orf41 | E2F6 | DHX57 | PRLR | GRID2IP | BTG2 | CRK | FRS2 |
| RAB3IP | TMEM255A | HAND1 | TAF9B | MED28 | RMI2 | TSPAN2 | TPP1 | IDH2+ |
| CRAMP1L | KIAA1161 | HECTD2 | PEG10 | PRRX1 | SEC14L1 | SPATA2 | PLCG2 | BTN2A1 |
| EIF4EBP2 | ATXN1L | PBX3 | POLL | PARP8 | FARP1 | SLC7A14 | WARS2 | MYO5B |
| BCL9 | LRRC10B | SLC5A9 | CERCAM | MSR1 | TREML1 | PUDP | LYVE1 | HELZ |
| EIF3D | TTC39C | AMT | CEP120 | GRAMD2B | FMO4 | STRN | NUDT15 | FOPNL |
| MED14 | TIA1 | SOCS4 | ZNF516 | SLC16A9 | PLXNA4 | ADAMTS5 | SPTBN4 | PANX2 |
| IGF2BP1 | GREB1 | RBFOX2 | FAM104A | PCDH20 | OLR1 | MEIS3 | DAGLA | CAP1 |
| NR6A1 | NAPEPLD | ASAP1 | SENP5 | C6orf203 | WDFY3 | TMEM143 | PLCB4 | DARS2 |
| ARID3B | PAK1 | PLXNC1 | PDP2 | PQLC2 | PNKD | TMEM178B | VGLL3 | ARMC9 |
| FIGN | MLXIP | DDX19B | EEF2K | SMUG1 | ABHD14B | SLC52A3 | CASKIN1 | KRT5 |
| GATM | C11orf57 | BEGAIN | MTDH | KATNAL1 | ZDHHC23 | TGDS | CPM | B3GAT3 |
| PGRMC1 | MARCH9 | HSPA14 | B4GAT1 | LRFN4 | PARS2 | KIAA1549 | PAX3 | RGPD8 |
| CCND2 | STARD13 | CNOT6L | MAPK8 | CRCT1 | TAB2 | PKN2 | WASL | PIK3CA |
| UTRN | HMGA2 | THOC2 | ATP2A2 | INTS6L | CRB2 | BRD3 | SBNO1 | MED6 |
| GNG5 | IGDCC3 | FAM122A | FASLG | IGF1 | ADGRL3 | KRTAP5-8 | HTR4 | RGPD6 |
| SKIL | FIGNL2 | DPP6 | RAB8B | EOGT | ZNF200 | GIPC1 | MMP11 | GPAT3 |
| YOD1 | PRTG | KLHDC8B | ACSL6 | SMAP1 | DLGAP4 | ATP6V1G1 | ARHGAP8 | FBXO22 |
| GXYLT1 | LIN28B | CARNMT1 | GALNT1 | CCNT2 | ZNF697 | AGO1 | RNF38 | MGLL |
| LPGAT1 | C14orf28 | PLXND1 | UHRF2 | CACNB4 | CHSY3 | ANKRD52 | EPHB1 | NEXMIF |
| IGF1R | TRIM71 | IL13 | TRANK1 | CLASP2 | STK24 | ZNF354A | ZNF215 | MDFI |
| E2F5 | PTAFR | KCTD17 | VIRMA | BCAT1 | DMP1 | FBXO32 | MYCBP | ICOS |
| C5orf51 | NPHP3 | HIP1 | MEF2C | RBMS2 | IL22RA1 | FKRP | TMEM144 | CCNY |
| PCGF3 | FRMD4B | PALD1 | ARID3A | C18orf21 | STOX2 | RNF170 | GOLGA4 | KREMEN1 |
| PBX2 | HIC2 | LIMD2 | GTF2I | RNF44 | MAPK9 | TUSC2 | SYT2 | COL9A1 |
| RGS16 | NAP1L1 | CD59 | RALB | SLC25A24 | ZNF512 | RAB40C | IFNLR1 | SEC31B |
| ERCC6 | CBX5 | SRGAP1 | GABBR2 | STXBP5 | RBM19 | NRARP | DOCK3 | RGPD5 |
| MAPK6 | SLF2 | KCTD21 | TECPR2 | TTL | PLEKHH1 | ZNF763 | ELK4 | DST |
| GALNT2 | SALL4 | GJC1 | RANBP2 | GDPD1 | SLC9A9 | RTL9 | SNN | RFX5 |
| USP24 | ADAMTS15 | MRS2 | STARD9 | TSC22D2 | TSPAN18 | SOCS1 | TEX261 | EPPIN |
| INSR | PAPPA | MYCN | ARL5A | ARRDC4 | CGNL1 | LIMK2 | GDAP2 | TENM2 |
| CD164 | CDC34 | ZNF322 | GPATCH2 | RCN1 | UTY | DOCK1 | UBE2K | DAPK2 |
| RDX | SLC10A7 | OSBPL3 | PLPP6 | AMER3 | OTOF | GLRX | ZNF792 | GAB3 |
| PDE12 | SFMBT1 | STIMATE | PLEKHO1 | AFF2 | KPNA1 | MFSD8 | SULF2 | PPP3CA |
| ANKRA2 | LRIG3 | FZD4 | ERCC4 | DPP3 | MGAT4A | C19orf84 | RNF5 | STARD4 |
| EDEM3 | ZNF512B | IGDCC4 | MASP1 | A1CF | NTRK3 | CEP164 | OSTF1 | USP6 |
| IRS2 | ZNF710 | ERO1A | C15orf39 | ZBTB10 | PAG1 | DOK3 | CCL28 | INPP5A |
| SEMA4C | PPP1R15B | PLEKHG6 | MMS22L | TXLNG | KLHL13 | SOGA3 | RGS6 | ENAM |
| DCAF15 | USP44 | GAN | CHD4 | MTUS1 | SSH1 | IKZF3 | LMX1A | PRDM11 |
| LRIG2 | BACH1 | LBR | PARPBP | USP32 | AK3 | ZBTB8OS | ERP29 | NSD1 |
| DUSP1 | ZSWIM5 | HDLBP | FGD6 | MAP4K4 | AGO3 | YTHDF3 | CLOCK | TSPYL5 |
| EPHA4 | DLC1 | TSPEAR | KLF8 | HMGA1 | LOXL4 | ABHD18 | IFT80 | ESPL1 |
| EEA1 | CCNJ | FGF11 | ACVR2A | SYNCRIP | PPP2R2A | ETNK1 | ZNF318 | TMED4 |
| GOLT1B | PIK3IP1 | CASP3 | ARMT1 | NAT8L | EPHA3 | TEAD3 | PPARA | RASA4 |
| WDR37 | STX3 | SLC38A9 | ABL2 | ZNF10 | RPUSD2 | MUC4 | GPR156 | SCGB2B2 |
| SCD | FZD3 | RNF20 | TBKBP1 | FBXO30 | WDR41 | SOX6 | BBX | PTPRO |
| P4HA2 | C8orf58 | ACTA1 | IKZF2 | EIF2S2 | LSM11 | SP8 | CNOT6 | EGR3 |
| ZBTB39 | ZNF644 | TMEM167A | RICTOR | NOL4L | PKD1L2 | BTBD3 | SREK1IP1 | KCNJ3 |
| DPH3 | SMIM3 | ABT1 | CRTAM | DICER1 | MIEF1 | SNAP23 | DKK3 | GABPA |
| RAB3GAP2 | CLDN12 | PPP1R16B | POGZ | TSC1 | C2 | FREM2 | COL1A1 | DYRK1A |
| PGM2L1 | NIPAL4 | PLPP5 | E2F2 | CANT1 | RAB15 | ZNF197 | BRWD1 | BCL2L1 |
| GRPEL2 | AGO4 | OPA3 | MBD2 | AMMECR1L | MXD1 | BRF2 | SERPINB9 | L2HGDH |
| CD200R1 | GNPTAB | SLC20A1 | ACER2 | GALE | CBX2 | TTC14 | SMIM13 | SBK1 |
| SMARCC1 | ADAMTS8 | DNAJC1 | ABCB9 | FCAR | MEX3A | EGLN2 | CREB3L2 | AGBL2 |
| PRDM5 | ADRB2 | ZNF784 | UGCG | CHIC1 | KMT2D | BCL7A | TMEM41A | MGA |
| RBMS1 | THRSP | ZNF275 | C19orf47 | GGA3 | OLFM4 | GALNT4 | ECHDC1 | SMAD2 |
| THBS1 | TET3 | GPR26 | AMOT | TRPM6 | ARMC8 | COL14A1 | CDKAL1 | ZNF548 |
| BCAP29 | CLCN5 | FBXL12 | FAM214B | ADRB1 | LHCGR | WNK3 | ACTR10 | SLC8A2 |
| ZNF566 | SMC1A | LIN28A | SESTD1 | MSN | SLC1A4 | MYO1F | SYNC | KRT78 |
| UBE2G2 | COL3A1 | MED8 | KIAA0930 | SDR42E1 | ATG10 | GPR132 | AGBL1 | GRAMD1B |
| DYRK2 | BIN3 | PLA2G3 | ABCC5 | LRTOMT | ERGIC1 | PLEKHG7 | TBX5 | SNX6 |
| RPS6KA3 | SLC35D2 | AEN | RNF165 | NLRP2B | PPT2 | TRIB2 | ZNF311 | LCE2D |
| NAA30 | ATP8B4 | LIPH | PLAGL2 | SIGMAR1 | RRM2 | ICMT | DMRT2 | SKIDA1 |
| RB1 | CPA4 | SLC31A2 | SCN11A | KLHL6 | STEAP3 | TMEM121B | RAG1 | MBTPS2 |
| RNMT | TGFBR3 | KCNC2 | VAV3 | PLD3 | USP49 | CACNA1I | ARID1B | ZNF432 |
| ADIPOR2 | ONECUT2 | AGAP1 | C20orf194 | PARD6B | KATNBL1 | MMP1 | NRK | CHRD |
| MLLT10 | IGF2BP3 | ELP1 | HOXD1 | TNFRSF1B | TEPSIN | VASH2 | HS2ST1 | TRIM33 |
| SPRYD4 | STK40 | ZNF583 | XK | FOXP2 | GPX7 | RORC | GRIN3A | OPRM1 |
| NME6 | MAP4K3 | ARHGAP28 | NME4 | SUCLG2 | MECP2 | CDCA8 | AAK1 | GFOD1 |
| NHLRC3 | DLST | SCN4B | FNIP2 | SLK | SOX13 | ESRP2 | MON2 | ANKRD49 |
| PXT1 | ADRB3 | GPCPD1 | MEIS2 | SCN5A | EPB41 | GABRA6 | FOXN3 | CLDN1 |
| POC1B-GALNT4 | HSPE1-MOB4 | PHOSPHO2-KLHL23 | EPPIN-WFDC6 |  |  |  |  |  |

# References

1. Wang L, Xie H, Xu L, et al. rSj16 Protects against DSS-Induced Colitis by Inhibiting the PPAR-α Signaling Pathway. *Theranostics*. 2017;7(14):3446-3460. DOI: 10.7150/thno.20359.
2. Dieleman LA, Palmen MJ, Akol H, et al. Chronic experimental colitis induced by dextran sulphate sodium (DSS) is characterized by Th1 and Th2 cytokines. Clinical and experimental immunology. 1998;114(3):385-391. DOI: 10.1046/j.1365-2249.1998.00728.x
